# Supplementary material
Source: PubMed Central journal article supplement (PMC2664613)
Supplement: NIHMS4462-supplement-S5.pdf [file NIHMS4462-supplement-S5.pdf]

Figure S5

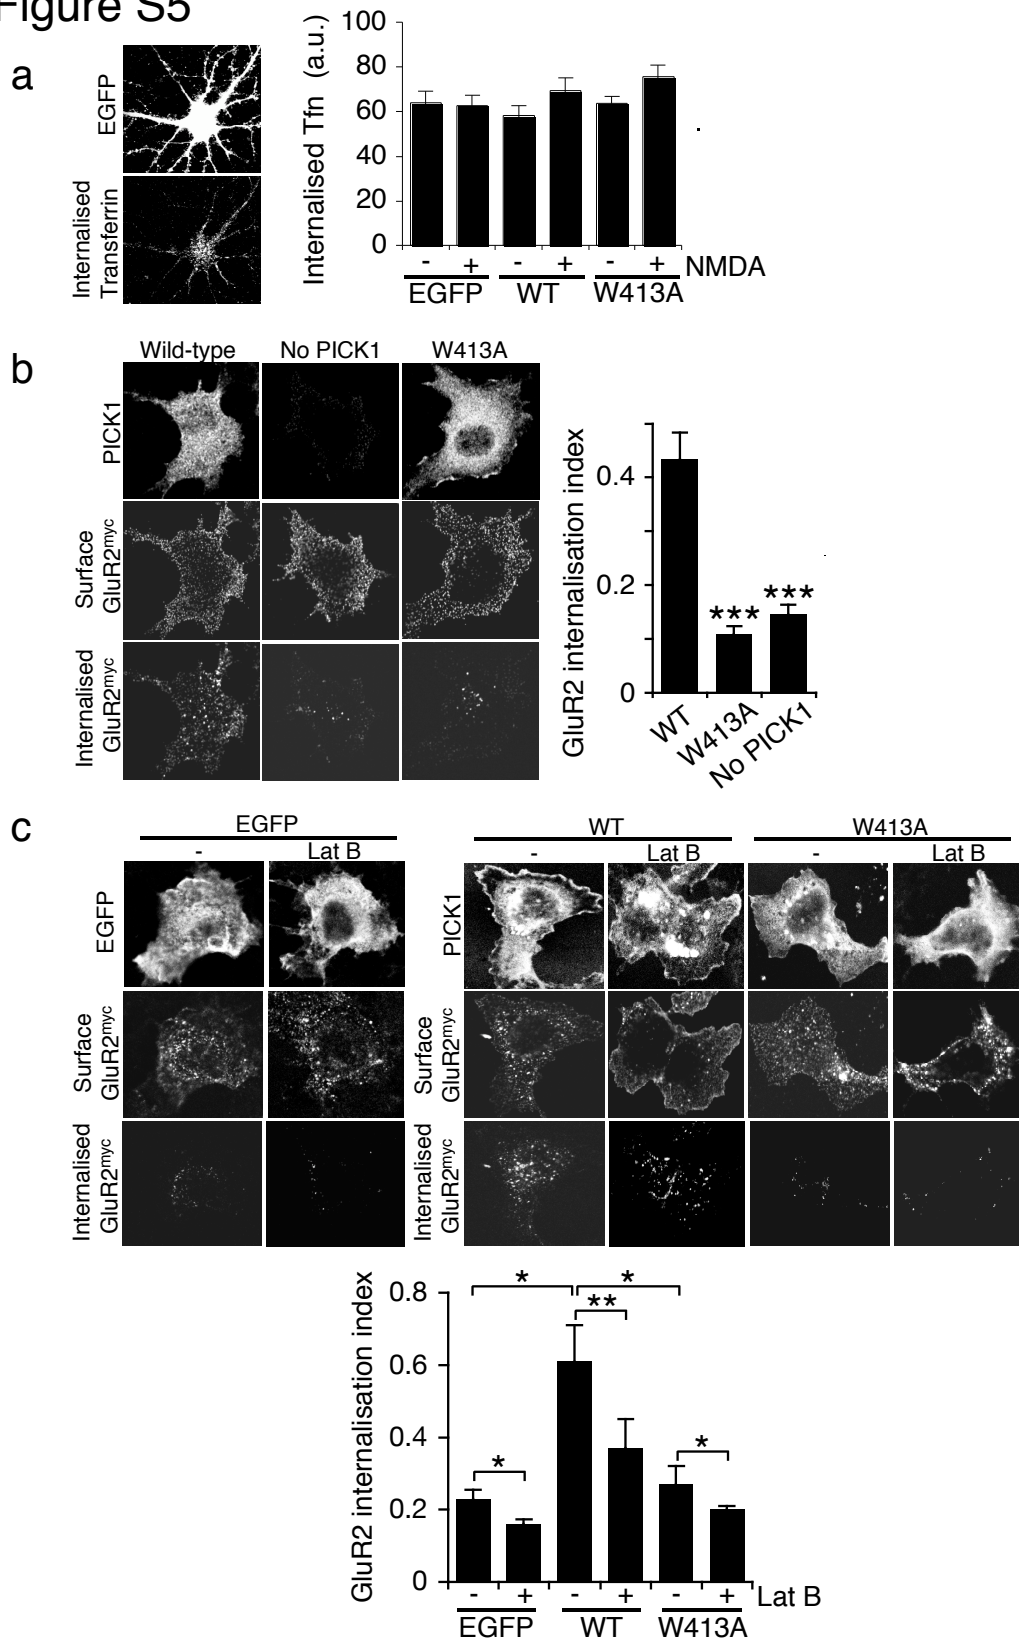

**Figure S5** Supplementary trafficking data.

- a) W413A-PICK1 does not affect transferrin receptor endocytosis. Hippocampal cultures overexpressing WT-PICK1 or W413A-PICK1 were subjected to NMDA-treatment and analysed using a fluorescent-conjugated transferrin endocytosis assay. Representative images are shown for EGFP-transduced cultures in the absence of NMDA. n=15 cells. Data are presented as mean  $\pm$  SEM.
- b) Arp2/3 binding is required for PICK1-mediated GluR2 endocytosis in heterologous cells. COS7 cells were transfected with myc-GluR2 and either WT-PICK1 or W413A-PICK1. Myc-GluR2 internalised in response to increased extracellular  $\text{Ca}^{2+}$  was analysed by antibody-feeding using anti-myc. Cells were fixed and subsequently stained for surface (red channel) and internalised (blue channel) myc-GluR2 using appropriate secondary antibodies. Total PICK1 was visualised with anti-PICK1 antibody. Representative images are shown for each condition, and graph shows pooled data for GluR2 internalisation index. n=15 cells, \*p<0.001. Data are presented as mean  $\pm$  SEM.
- c) Latrunculin B does not reverse the blockade of GluR2 endocytosis by the W413A mutation in heterologous cells. COS7 cells co-expressing WT- or W413A- PICK1 and myc-GluR2 were treated with 2.5 $\mu$ M Latrunculin B or vehicle control for 1 hour prior to antibody-feeding using anti-myc, as in (a), above. Total PICK1 and GFP expression were visualised using anti-PICK1 antibody or inherent GFP fluorescence. Representative images are shown for each condition and graph shows pooled data for GluR2 internalisation index (internalized/surface + internalized). n=15 cells. \*p<0.05, \*\*p<0.01. Data are presented as mean  $\pm$  SEM.
