# Supplementary material
Source: PubMed Central journal article supplement (PMC2664613)
Supplement: NIHMS4462-supplement-S6.pdf [file NIHMS4462-supplement-S6.pdf]

## Figure S6

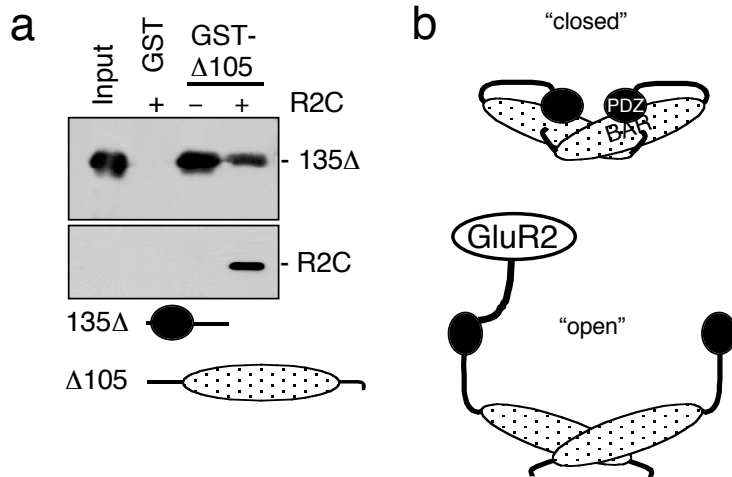

**Figure S6** Allosteric regulation of PICK1.

- (a) R2C inhibits the PICK1 BAR-PDZ intramolecular interaction. GST-PICK1 complexed with his<sub>6</sub>mycR2C was immobilised on glutathione-agarose beads and incubated with his<sub>6</sub>flag135 $\Delta$ -PICK1. Bound proteins were detected by immunoblotting using anti-myc or anti-flag.
- (b) Schematic depicting PICK1, with PDZ domain unoccupied, ("closed conformation"), and in complex with GluR2 C-terminus ("open conformation"). The "open" conformation allows efficient binding of non-PDZ interactions.
